# Supplementary material
Source: PubMed Central journal article supplement (PMC3989631)
Supplement: embj0033-0512-sd4.pdf [file embj0033-0512-sd4.pdf]

### Figure S2: Vesicle content and number of dense projections remain unchanged

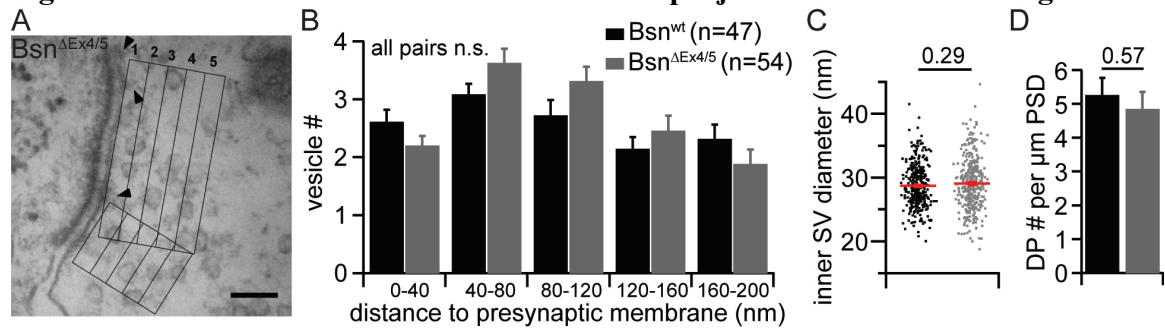

**A, B**) Vesicles in five 40 nm bins from the presynaptic membrane to the presynaptic cytosol were counted: no significant differences between the genotypes were observed. Arrowheads mark dense projections (scale bar: 100 nm). Membrane- and dense projection-associated vesicles were not altered in the mutant (data not shown). **C**) The diameter of synaptic vesicles and the number of presynaptic dense projections (DP) was unchanged in the mutant **(D)**.

### Figure S3: Parasagittal slice preparation and target region for patch clamp experiments

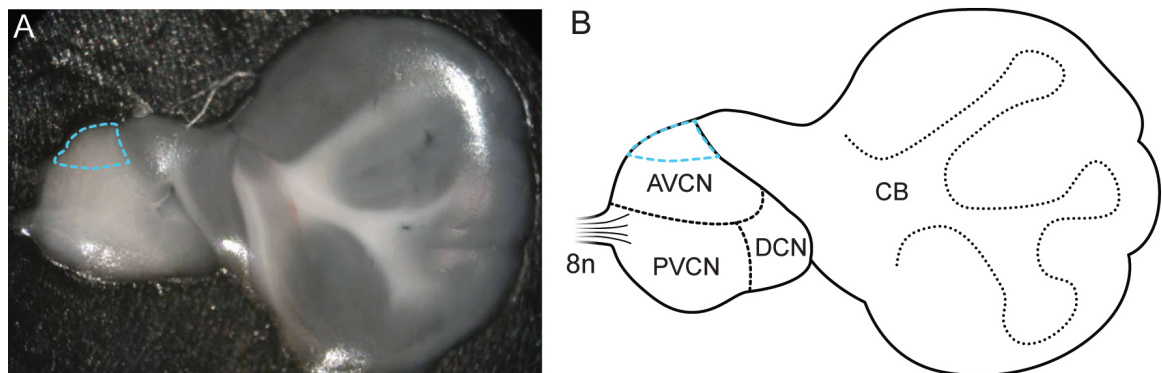

**A**) Acute parasagittal slice preparation. The target area for patch-clamp experiments is delimited by the green broken line within the AVCN. **B**) Schematic representation of a typical slice for anatomical references: AVCN – anteroventral cochlear nucleus; PVCN – posteroventral cochlear nucleus; DCN – dorsal cochlear nucleus; 8n – 8th cranial nerve root; CB – cerebellum.
