# Supplementary material
Source: PubMed Central journal article supplement (PMC3989631)
Supplement: embj0033-0512-sd6.pdf [file embj0033-0512-sd6.pdf]

**Figure S5: No evidence for dominant negative effects of the Bsn<sup>ΔEx4/5</sup> fragment**

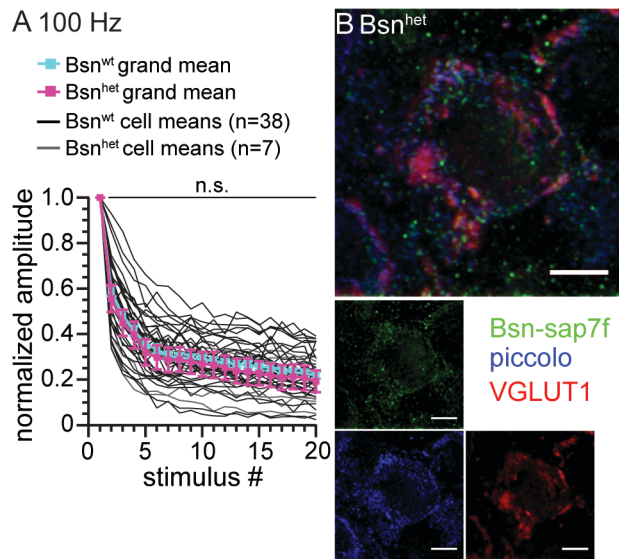

**A)** Short-term depression does not differ between synapses from Bsn<sup>wt</sup> (n = 38) and Bsn<sup>het</sup> mice (n = 7), 100 Hz stimulation. **B)** Maximum projection of a confocal image stack a Bsn<sup>het</sup> BC: Labeling of bassoon's sap7f (green) epitope shows punctate expression colocalizing with Piccolo (blue) at active zones.

**Figure S6: Asynchronous release after high frequency stimulation of Bsn<sup>ΔEx4/5</sup> synapses**

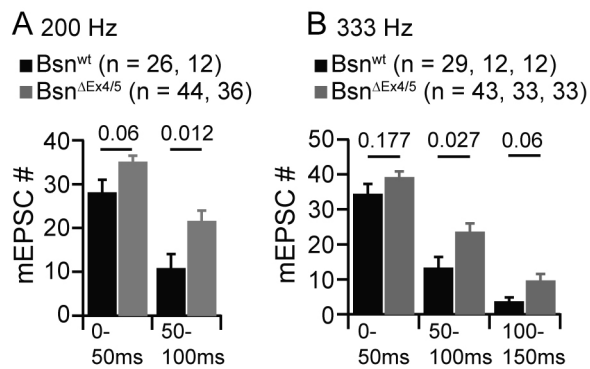

Asynchronous release events after high-frequency stimulation at 200 Hz (**A**) and 333 Hz (**B**) are more numerous for Bsn<sup>ΔEx4/5</sup> mutant synapses.
