# Supplementary material
Source: PubMed Central journal article supplement (PMC3989631)
Supplement: embj0033-0512-sd8.pdf [file embj0033-0512-sd8.pdf]

**Figure S7: Analysis of BC action potential generation**

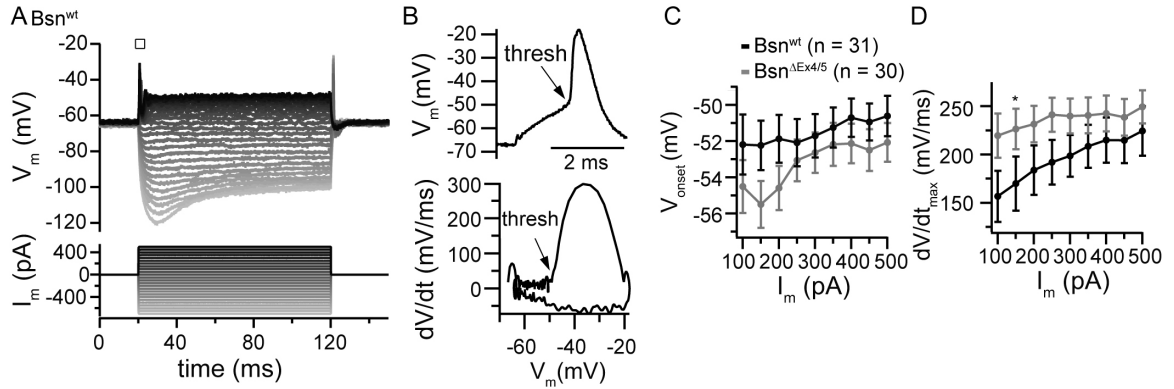

**A)** Example traces in response to a current step protocol of a  $Bsn^{wt}$  BC. **B)** Enlarged plot of an action potential and its corresponding phase plot at the beginning of a depolarizing current injection. **C)** Action potential onset, defined as where the slope surpassed 45 mV/ms remain unchanged. **D)**  $Bsn^{\Delta Ex4/5}$  BCs showed a trend towards faster maximum depolarization speed during action potentials.
