# Supplementary material
Source: PubMed Central journal article supplement (PMC3989631)
Supplement: embj0033-0512-sd9.pdf [file embj0033-0512-sd9.pdf]

**Figure S8: Preserved auditory transmission at  $Bsn^{\Delta Ex4/5}$  endbulbs when matching input**

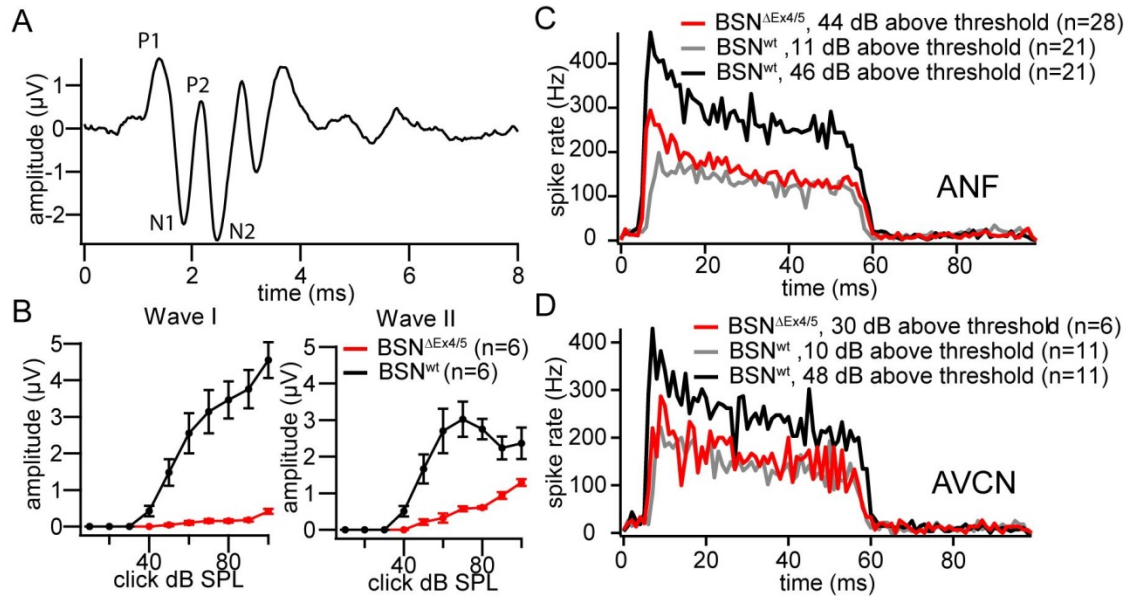

**A)** Representative ABR wave evoked by 80 dB click at a repetition rate of 20 Hz. P1, N1 and P2, N2 indicate the positive and negative peak of ABR wave I and wave II, respectively. **B)** Quantification of input-output function of ABR wave I and wave II amplitude to clicks. Analysis in A and B was performed on data from experiments originally described in (Jing et al., 2013). **C, D)** PSTHs of ANF (**C**) and AVCN BC (**D**) units in response to CF tones presented at different sound pressure levels (SPL) during rate-level function runs. Average SPLs used for stimulation are shown in respective figure legend. Most ANF and bushy cells have a dynamic range of 10-25dB SPL before their firing rate saturates. The average adapted firing rates of putative  $Bsn^{wt}$  ANFs matched the maximal ones of  $Bsn^{\Delta Ex4/5}$  ANFs when SPLs were reduced to around 11 dB above threshold. A reduced input (on average 10 dB above threshold) also evoked similar average adapted firing rate for both  $Bsn^{wt}$  and  $Bsn^{\Delta Ex4/5}$  AVCN BC units (n.s., Wilcoxon-rank-test), suggesting no further impairment in synaptic transmission at endbulb synapses due to bassoon disruption at the rates amenable to sound stimulation.

### Explanation of experimental rationale and results of figure S8:

Previous studies have shown reduced ANF sound-driven activity in  $Bsn^{\Delta Ex4/5}$  mice (Buran et al., 2010, Jing et al., 2013), so that BCs of  $Bsn^{\Delta Ex4/5}$  receive less input from ANFs *in vivo*. We compared that with the responses of BCs in  $Bsn^{wt}$  mice to reduced sound intensities as a way to match the input strength from ANFs. If there is any dysfunction between the transmission of auditory information between ANFs and BCs in  $Bsn^{\Delta Ex4/5}$ , it should be translated into a difference in AVCN responses when input from ANFs were matched between  $Bsn^{\Delta Ex4/5}$  and  $Bsn^{wt}$  mice. We then found that AVCN rates in response to matched ANF

input in Bsn<sup>ΔEx4/5</sup> and Bsn<sup>wt</sup> were very similar, indicating no further degradation of transmission at endbulb synapses upon bassoon disruption.

### **References:**

Jing, Z., Rutherford, M.A., Takago, H., Frank, T., Fejtova, A., Khimich, D., Moser, T., and Strenzke, N. (2013). Disruption of the presynaptic cytomatrix protein bassoon degrades ribbon anchorage, multiquantal release, and sound encoding at the hair cell afferent synapse. *J. Neurosci.* 33, 4456–4467.
