# Supplementary material
Source: PubMed Central journal article supplement (PMC3989631)
Supplement: embj0033-0512-sd10.pdf [file embj0033-0512-sd10.pdf]

## **Supplementary materials:**

### **Antibodies used for immunohistochemistry:**

The following antibodies were used: mouse anti-Gephyrin (Synaptic Systems, Göttingen, Germany 1:400, kind gift of Dr. T. Dresbach, Göttingen University), mouse anti-neurofilament (Sigma, St. Louis, USA, 1:500), rabbit anti-ankyrin G (Santa Cruz Biotechnology, Santa Cruz, CA, USA 1:300), goat anti-calretinin (Swant, Marly, Switzerland, 1:300), mouse anti-Sap7f407 to Bassoon (Abcam, Cambridge, UK, 1:500), rabbit anti-Piccolo (Synaptic Systems, Göttingen, Germany 1:200), rabbit anti-Munc13-1 (Synaptic Systems, Göttingen, Germany 1:200), rabbit anti-RIM2 (Synaptic Systems, 1:200), guinea pig anti-VGLUT1 (Synaptic Systems, 1:1000), guinea pig anti-Bassoon C-terminal (Synaptic Systems, 1:200), rabbit anti-Mover (Synaptic Systems, Göttingen, Germany 1:1600), mouse anti-VGAT (Synaptic Systems, Göttingen, Germany 1:600), and secondaries AlexaFluor488-, AlexaFluor568- and AlexaFluor647-labeled antibodies (Invitrogen, 1:200).
